# Supplementary material
Source: publisher figshare collection journal article supplement (https://frontiersin.figshare.com/ndownloader/files/22315647)
Supplement: Supplementary file [file 22315647]

A

## Effect of C-terminal region on IgG binding

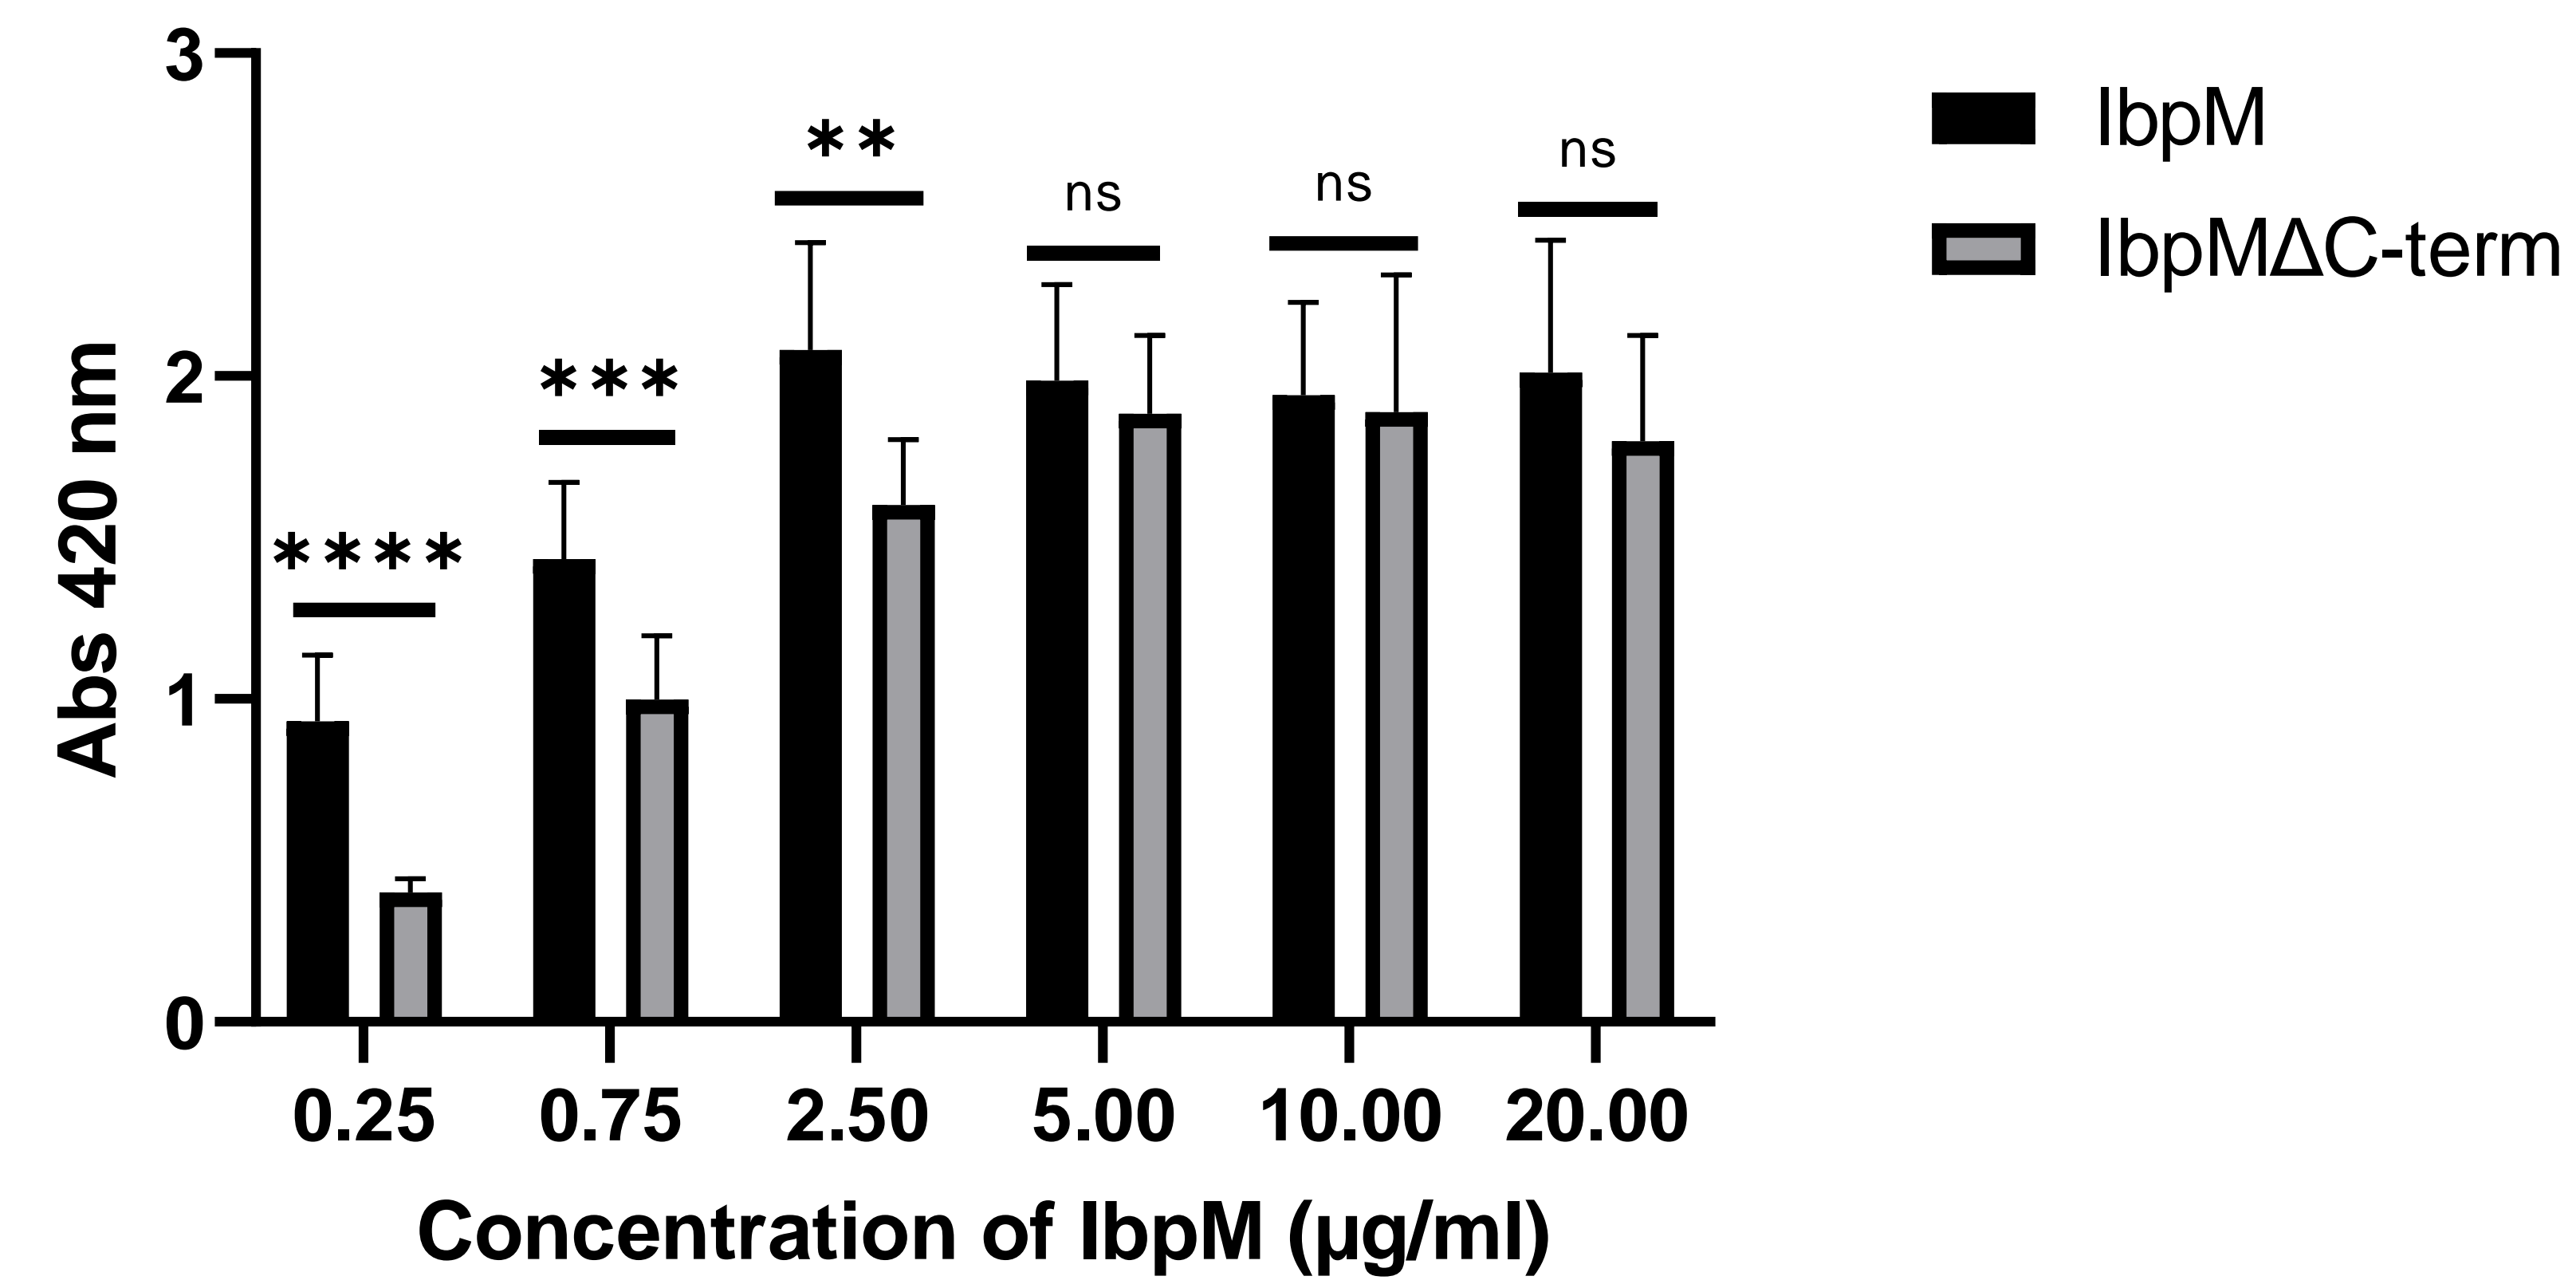

B

## Effect of C-terminal region on IgA binding

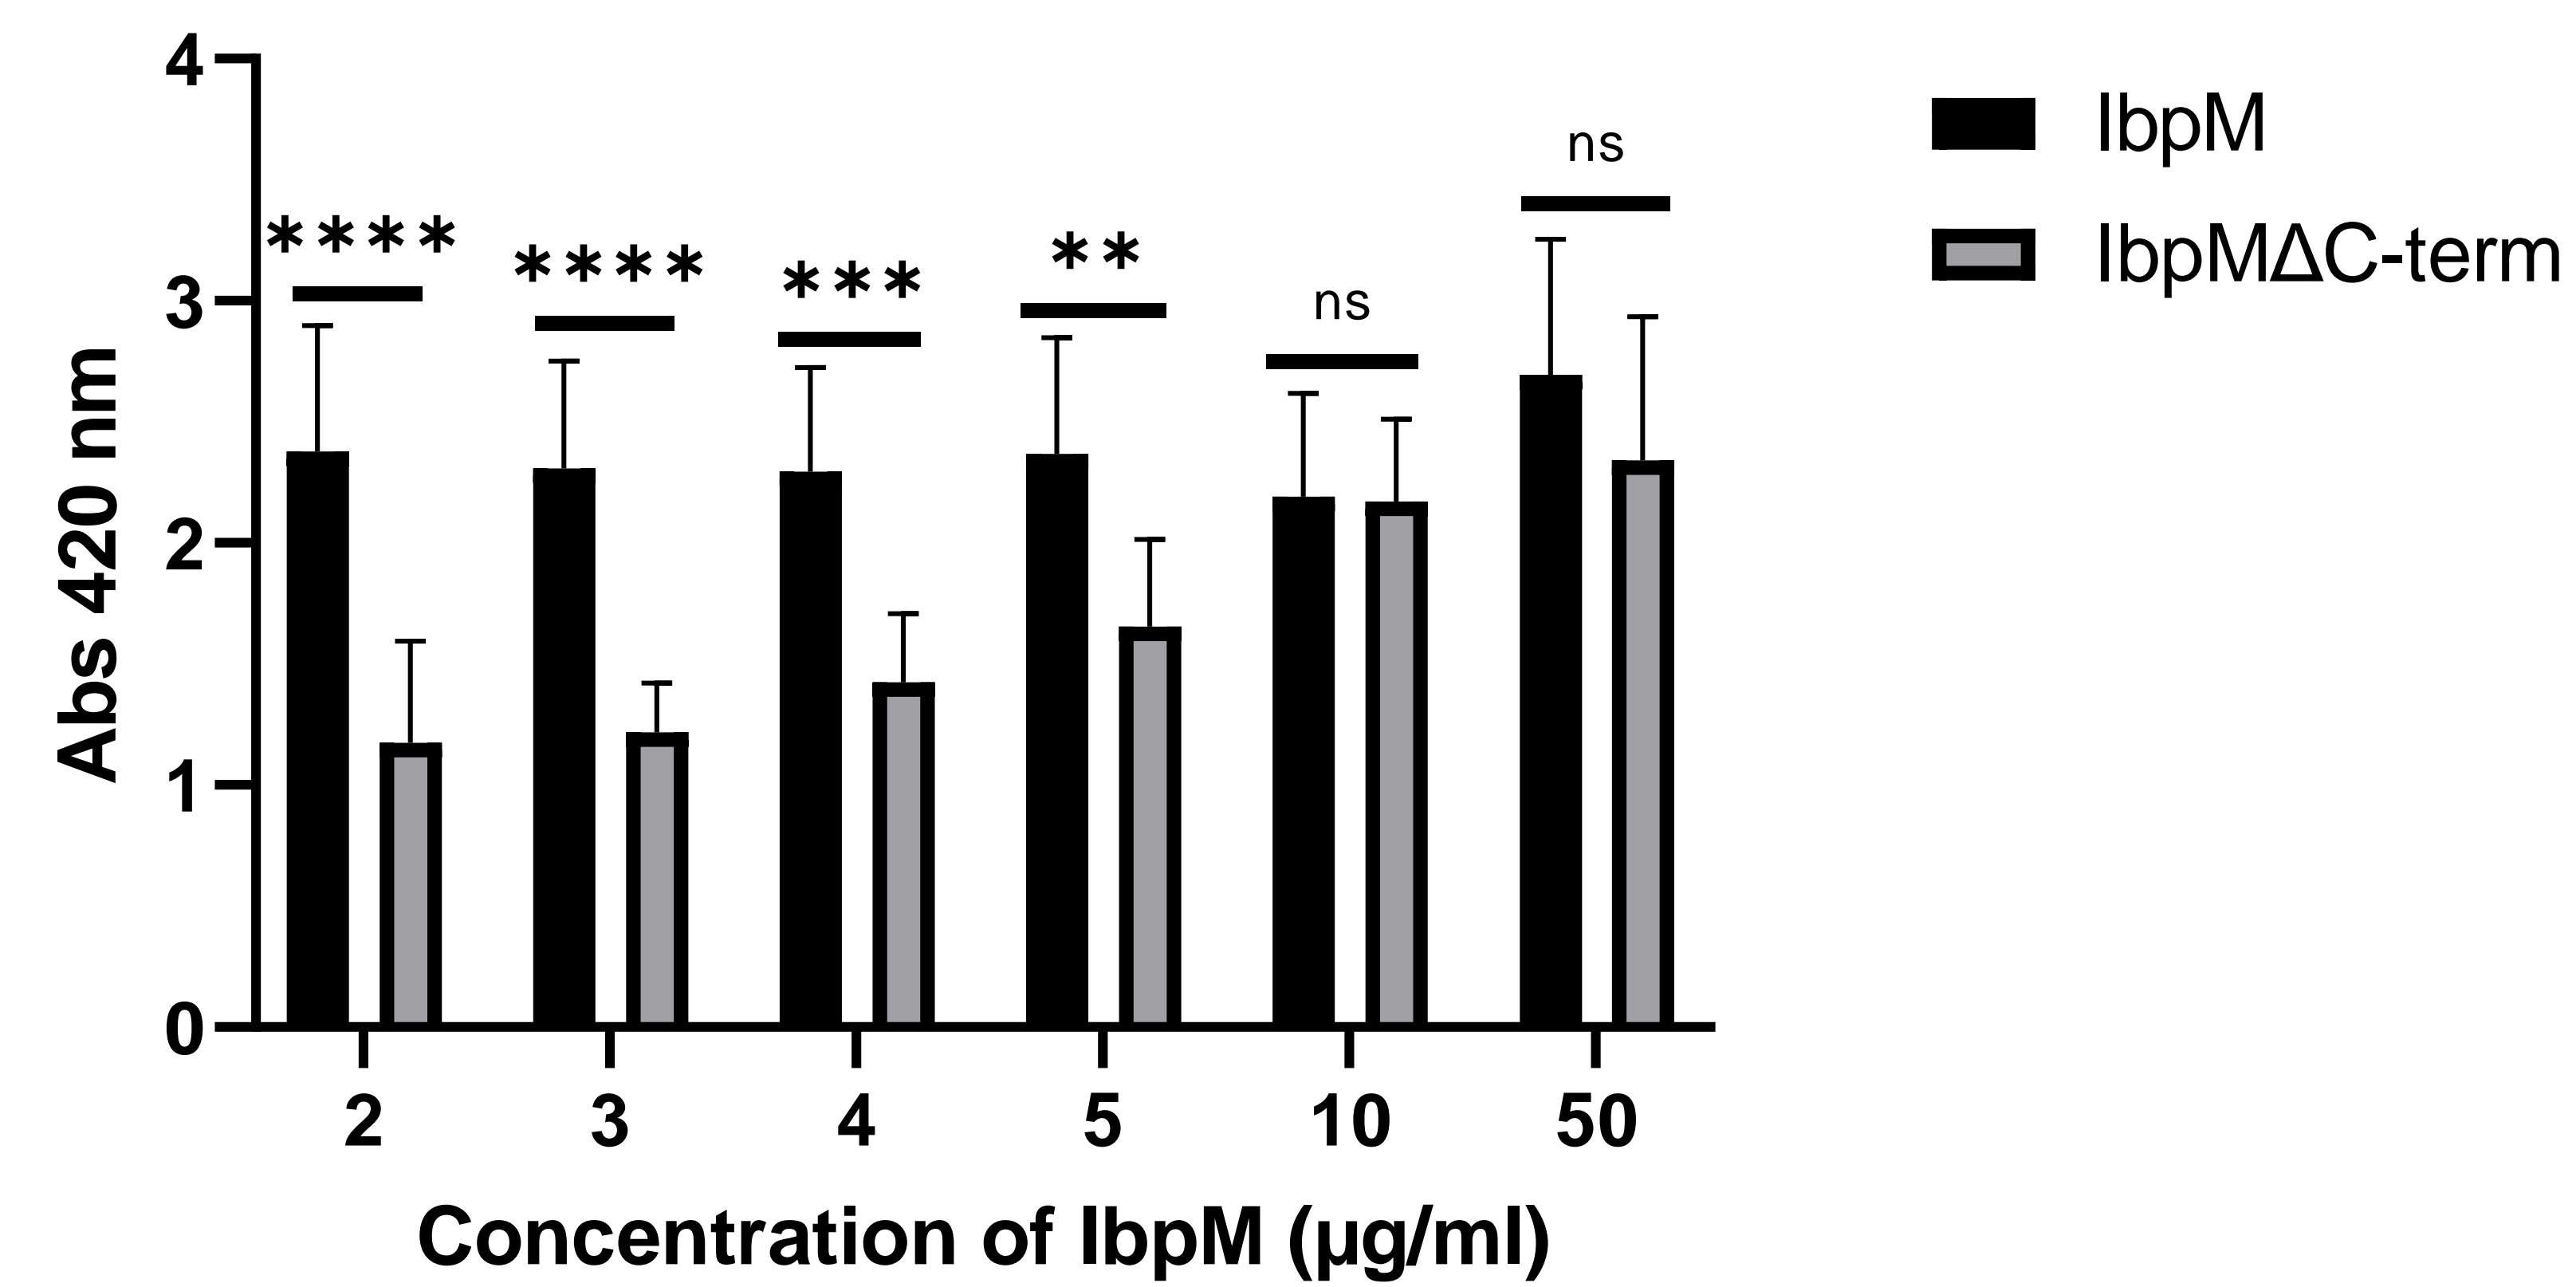

C

## Effect of C-terminal region on IgM binding

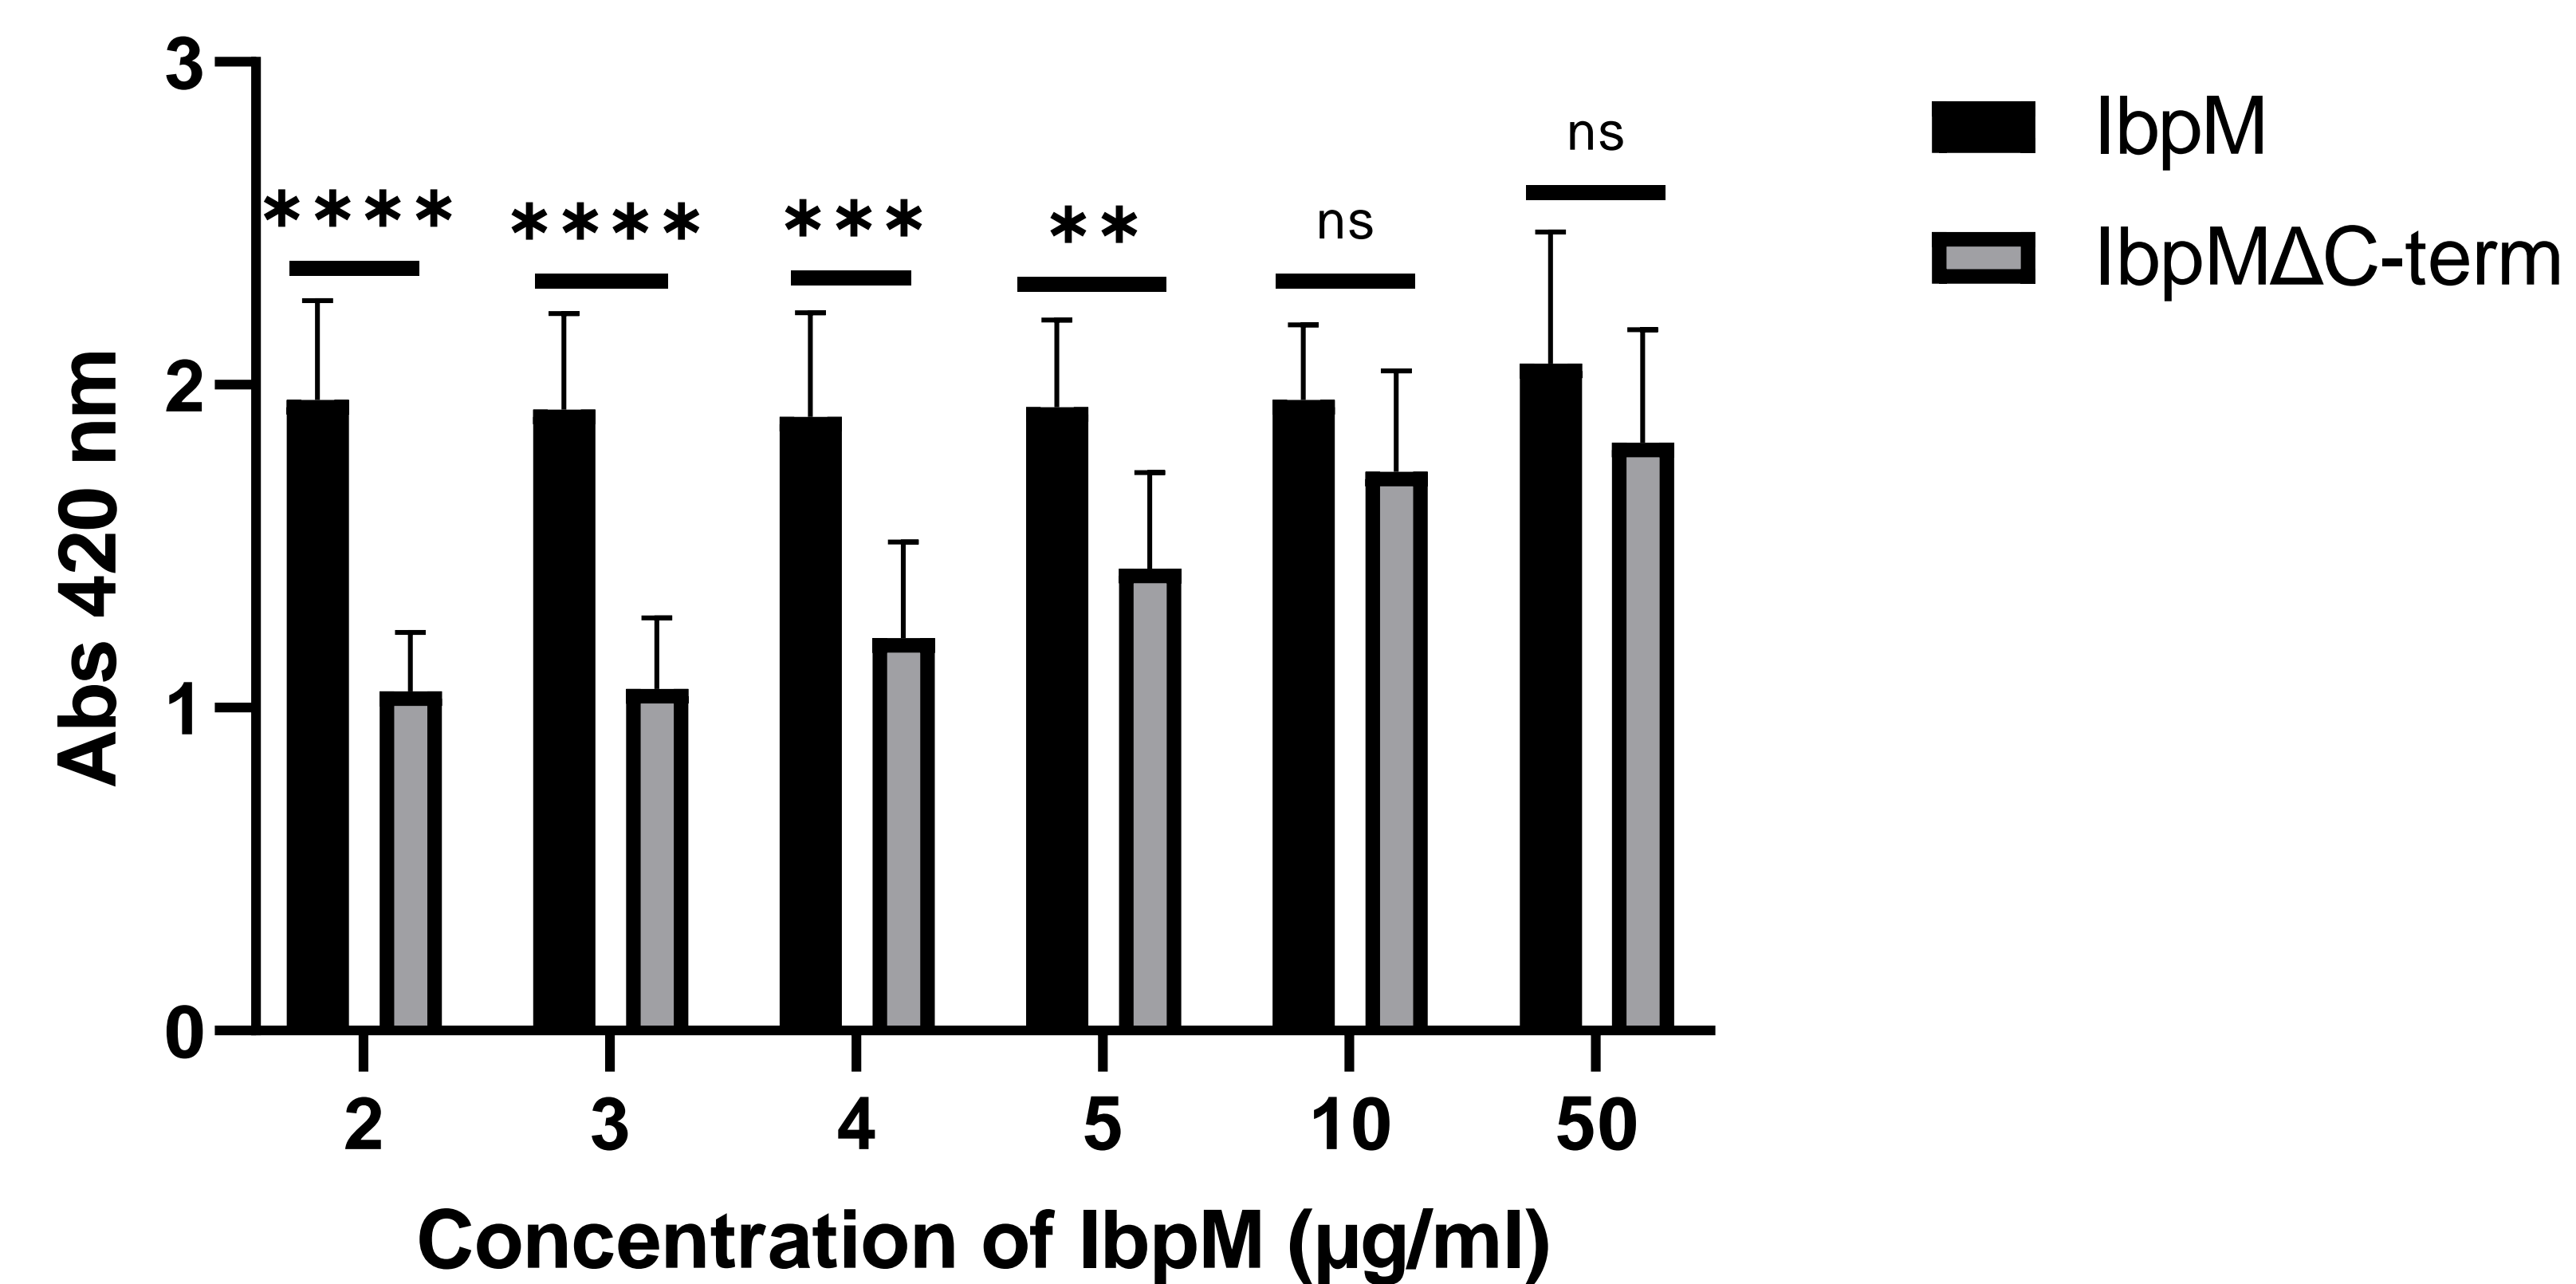

**Supplementary Figure S1. Ability of IbpM to bind different Ig's and the effect of the C-terminal region on binding.** Using ELISA, purified full-length IbpM was coated in different concentrations onto 96-well plates and incubated with IgG (A), IgA (B) or IgM (C). Binding of Igs was quantified by the detection with rabbit  $\alpha$ -human Ig -AP antibody responsible for ABTS color formation and detection at 420 nm. The statistical significance of the influence of the C-terminal region on the binding between IbpM and Igs is indicated by the following scheme: \*\*\*\* is  $P \leq 0.0001$ , \*\*\* is  $P \leq 0.001$ , \*\* is  $P \leq 0.01$ , ns is  $P > 0.05$ .
